# Supplementary material
Source: PubMed Central journal article supplement (PMC1895868)
Supplement: blood_blood-2005-09-008086_1.pdf [file blood_blood-2005-09-008086_1.pdf]

| Cell Line | Drug Combination        | Cell Viability |           | Apoptosis |           |
|-----------|-------------------------|----------------|-----------|-----------|-----------|
|           |                         | Observed       | Predicted | Observed  | Predicted |
| MOLT4     | Ida + VPA 0.25 mM       | .48            | .27       | .20       | .18       |
| MOLT4     | Ida + VPA 1 mM          | .53            | .49       | .29       | .24       |
| MOLT4     | Ida + VPA 1.5 mM        | .67            | .57       | ND        |           |
| MOLT4     | Ida + VPA 3 Mm          | .95            | .85       | .82       | .72       |
| MOLT4     | Ida + Vor 0.075 $\mu$ M | .31            | .25       | .13       | .17       |
| MOLT4     | Ida + Vor 0.3 $\mu$ M   | .54            | .53       | .40       | .25       |
| MOLT4     | Ida + Vor 0.45 $\mu$ M  | .95            | .90       | .89       | .80       |
| MOLT4     | Ida + Vor 1 $\mu$ M     | .97            | .97       | .92       | .89       |
| HL60      | Ida + VPA 0.25 mM       | .39            | .28       | .04       | .07       |
| HL60      | Ida + VPA 1 mM          | .53            | .38       | .04       | .06       |
| HL60      | Ida + VPA 1.5 mM        | .77            | .41       | ND        |           |
| HL60      | Ida + VPA 3 Mm          | .62            | .56       | .07       | .07       |
| HL60      | Ida + Vor 0.075 $\mu$ M | .41            | .28       | .02       | 0.06      |
| HL60      | Ida + Vor 0.3 $\mu$ M   | .51            | .45       | .05       | 0.1       |
| HL60      | Ida + Vor 0.45 $\mu$ M  | .64            | .59       | .19       | .23       |
| HL60      | Ida + Vor 1 $\mu$ M     | .98            | .97       | .61       | .53       |

Ida, idarubicin; VPA, valproic acid; Vor, vorinostat; ND, not done. Idarubicin was used at the cell specific IC<sub>10</sub>: 0.5 nM for MOLT4 and 1.5 nM for HL60. Using the fractional method of Webb<sup>13</sup>, a combination is considered unlikely to be antagonistic if the observed fractional inhibition is superior to the predicted.
