# Supplementary material
Source: PubMed Central journal article supplement (PMC1895868)
Supplement: blood_blood-2005-09-008086_2.pdf [file blood_blood-2005-09-008086_2.pdf]

---

| <b>Patient</b> | <b>Diagnosis</b> | <b>Age</b> | <b>WBC K/uL<br/>(% blasts)</b> | <b>Cytogenetics</b> | <b>Number of<br/>prior treatments</b> |
|----------------|------------------|------------|--------------------------------|---------------------|---------------------------------------|
| 1              | Ph+ ALL          | 30         | 55.7 (84)                      | t(9;22)             | 2                                     |
| 2              | AML              | 86         | 3.1 (57)                       | Complex             | 0                                     |
| 3              | ALL              | 46         | 11.9 (50)                      | Complex             | 3                                     |

---

Ph, Philadelphia chromosome; AML, acute myelogenous leukemia; ALL, acute lymphocytic leukemia; WBC, white blood cell count
