# Supplementary material
Source: PubMed Central journal article supplement (PMC1895868)
Supplement: blood_blood-2005-09-008086_3.pdf [file blood_blood-2005-09-008086_3.pdf]

| <b>Molt4</b> |    | <b>control</b> | <b>IDA 0.5nM</b> | <b>VPA 0.25 mM</b> | <b>IDA 0.5nM+VPA 0.25mM</b> | <b>VPA 1mM</b> | <b>IDA 0.5nM+VPA 1mM</b> | <b>VPA 3 mM</b> | <b>IDA 1.5 nM+VPA 3 mM</b> | <b>IDA 0.5nM</b> | <b>Vor 0.075 uM</b> | <b>IDA0.5 nM+Vor 0.075 uM</b> | <b>Vor 0.3 uM</b> | <b>IDA 0.5 nM+Vor 0.3 uM</b> | <b>Vor 1uM</b> | <b>IDA 0.5nM+or 1uM</b> |
|--------------|----|----------------|------------------|--------------------|-----------------------------|----------------|--------------------------|-----------------|----------------------------|------------------|---------------------|-------------------------------|-------------------|------------------------------|----------------|-------------------------|
| <b>G1</b>    | 50 | 46             | 45               | 46                 | 45                          | 52             | 54                       | 56              | 46                         | 58               | 42                  | 55                            | 54                | 42                           | 48             |                         |
| <b>G2</b>    | 14 | 13             | 13               | 12                 | 10                          | 10             | 10                       | 13              | 13                         | 11               | 12                  | 13                            | 12                | 22                           | 13             |                         |
| <b>S</b>     | 35 | 40             | 41               | 41                 | 40                          | 38             | 45                       | 31              | 40                         | 31               | 46                  | 32                            | 34                | 36                           | 39             |                         |

  

| <b>HL60</b> |    | <b>control</b> | <b>IDA 1.5 nM</b> | <b>VPA 0.25 mM</b> | <b>IDA 1.5 nM+VPA 0.25 mM</b> | <b>VPA 1mM</b> | <b>IDA 1.5 nM+VPA 1 mM</b> | <b>VPA 3mM</b> | <b>IDA 1.5nM+VPA 3mM</b> | <b>IDA 1.5nM</b> | <b>Vor 0.075uM</b> | <b>IDA 1.5nM+Vor 0.075uM</b> | <b>Vor 0.3uM</b> | <b>IDA 1.5nM+Vor 0.3uM</b> | <b>Vor 1uM</b> | <b>IDA 1.5nM+Vor 1uM</b> |
|-------------|----|----------------|-------------------|--------------------|-------------------------------|----------------|----------------------------|----------------|--------------------------|------------------|--------------------|------------------------------|------------------|----------------------------|----------------|--------------------------|
| <b>G1</b>   | 39 | 32             | 32                | 24                 | 31                            | 18             | 53                         | 50             | 32                       | 40               | 33                 | 39                           | 29               | 47                         | 54             |                          |
| <b>G2</b>   | 10 | 0              | 6                 | 8                  | 10                            | 7              | 9                          | 7              | 0                        | 15               | 2                  | 10                           | 14               | 53                         | 26             |                          |
| <b>S</b>    | 50 | 67             | 61                | 68                 | 59                            | 74             | 37                         | 38             | 67                       | 45               | 65                 | 51                           | 56               | 0                          | 20             |                          |

Figures indicate percentage of cells
